1 **Analytical Performance of a Standardized Kit for Mass Spectrometry-based Measurements**  
2 **of Human Glycosaminoglycans**

3 **Authors:** Davide Tamburro<sup>1</sup>, Sinisa Bratulic<sup>2</sup>, Souad Abou Shameh<sup>1</sup>, Nikul K Soni<sup>2</sup>, Andrea  
4 Bacconi<sup>1</sup>, Francesca Maccari<sup>3</sup>, Fabio Galeotti<sup>3</sup>, Karin Mattsson<sup>1</sup>, Nicola Volpi<sup>3</sup>, Jens Nielsen<sup>2,5,4</sup>,  
5 Francesco Gatto<sup>1,2</sup>.

6 **Affiliations:**

7 <sup>1</sup> Elypta AB, 171 65 Solna, Sweden.

8 <sup>2</sup> Department of Biology and Biological Engineering, Chalmers University of Technology, 412 96  
9 Göteborg, Sweden.

10 <sup>3</sup> Department of Life Sciences, University of Modena and Reggio Emilia, 41125 Modena, Italy.

11 <sup>4</sup> BioInnovation Institute, DK 2200 Copenhagen, Denmark

12 **Contacts:**

13 To whom correspondence should be addressed: F. Gatto [gatto@elypta.com](mailto:gatto@elypta.com)

14

15 **Summary:** Analytical performance of a kit for standardized GAG measurements, based on an  
16 established LC-MS/MS method

17

## 1 **Abstract**

2 Glycosaminoglycans (GAGs) are long linear sulfated polysaccharides implicated in  
3 processes linked to disease development such as mucopolysaccharidosis, respiratory failure,  
4 cancer, and viral infections, thereby serving as potential biomarkers. A successful clinical  
5 translation of GAGs as biomarkers depends on the availability of standardized GAG  
6 measurements. However, owing to the analytical complexity associated with the quantification of  
7 GAG concentration and structural composition, a standardized method to simultaneously measure  
8 multiple GAGs is missing. In this study, we sought to characterize the analytical performance of a  
9 liquid chromatography coupled with triple-quadrupole tandem mass spectrometry (LC-MS/MS)-  
10 based kit for the quantification of 17 GAG disaccharides. The kit showed acceptable linearity,  
11 selectivity and specificity, accuracy and precision, and analyte stability in the absolute  
12 quantification of 15 GAG disaccharides. In native human samples, here using urine as a reference  
13 matrix, the analytical performance of the kit was acceptable for the quantification of CS  
14 disaccharides. Intra- and inter-laboratory tests performed in an external laboratory demonstrated  
15 robust reproducibility of GAG measurements showing that the kit was acceptably standardized. In  
16 conclusion, these results indicated that the LC-MS/MS kit was standardized for the simultaneous  
17 measurement of GAG disaccharides allowing for comparability of measurements and enabling  
18 translational research.

19

## 1 **1 Introduction**

2 Glycosaminoglycans (GAGs) are a family of long linear polysaccharides consisting of  
3 repeating disaccharide units (*1*). Different structural disaccharides of GAGs have been  
4 characterized. In humans, the most prevalent classes are chondroitine sulfate (CS) [( $\rightarrow$ 3)- $\beta$ -D-  
5 GalNAc(1 $\rightarrow$ 4)- $\beta$ -D-GlcA or  $\alpha$ -L-IdoA(1 $\rightarrow$ )], heparan sulfate (HS) [( $\rightarrow$ 4)- $\alpha$ -D-GlcNAc or  $\alpha$ -D-  
6 GlcNS(1 $\rightarrow$ 4)- $\beta$ -D-GlcA or  $\alpha$ -L-IdoA (1 $\rightarrow$ )], and hyaluronic acid (HA) [( $\rightarrow$ 3)- $\beta$ -D-GlcNAc(1  $\rightarrow$   
7 4)- $\beta$ -D-GlcA(1 $\rightarrow$ )] where GalNAc is N-acetylgalactosamine, GlcA is glucuronic acid, IdoA is  
8 iduronic acid, GlcNAc is N-acetylglucosamine, and GlcNS is N-sulfoglucosamine. CS and HS  
9 disaccharides can each be further modified with O-sulfo groups in up to three positions. The  
10 modifications afford eight different sulfation patterns that modulate the biophysical properties of  
11 CS and HS in the extracellular matrix.

12 This physio-chemical diversity of GAG disaccharides enables highly diverse biological  
13 functions and implicates GAGs in health- and disease-relevant processes such as cell proliferation  
14 and wound healing (2, 3). For this reason, GAGs showed promise as biomarkers in several diseases,  
15 like mucopolysaccharidosis (4), respiratory failure (5, 6), cancer (7–9), and viral infections (10).

16 Precise measurements of GAG concentration and structural composition at the level of  
17 individual GAG disaccharides are crucial for structure-function studies on the importance of GAGs  
18 in human health and disease. Moreover, standardization of GAG measurements is imperative for  
19 future clinical translation in biomarker discovery. In recent years, liquid chromatography coupled  
20 with triple-quadrupole tandem mass spectrometry (LC-MS/MS) emerged as the reference platform  
21 for robust and reliable GAG quantification (11–23). However, no standardized kit is currently  
22 available hampering the comparability of findings and translational research.

1           Here, we describe a kit based on a previously established method for GAG extraction and  
2 detection by Volpi et al. (12). In short, this method relies on the enzymatic depolymerization of  
3 GAGs into disaccharides and their subsequent derivatization using 2-aminoacridone (AMAC).  
4 Separation is achieved using ultra-high-performance liquid chromatography (UHPLC) and  
5 detection using electrospray ionization triple-quadrupole mass spectrometry (ESI-MS/MS) through  
6 multiple reaction monitoring. Even though this method has been described extensively in the  
7 literature (refs), a standardized kit based on it is lacking and its analytical performance  
8 characteristics are unknown. Thus, we sought to perform a systematic evaluation of the kit's  
9 analytical performance characteristics.

## 10 **2 Material and Methods.**

### 11 **2.1 Glycosaminoglycan quantification method.**

12           We independently quantified concentrations (in  $\mu\text{g mL}^{-1}$ ) of 8 CS disaccharides (0s CS, 2s  
13 CS, 6s CS, 4s CS, 2s6s CS, 2s4s CS, 4s6s CS, Tris CS), 8 HS disaccharides (0s HS, 2s HS, 6s HS,  
14 Ns HS, Ns6s HS, Ns2s HS, 2s6s HS, Tris HS) and HA. Also, we calculated the total concentration  
15 of CS and HS as the sum of the corresponding disaccharide concentrations. Unless otherwise  
16 specified, we performed GAG extraction, detection, and quantification in a single commercial  
17 laboratory (reference laboratory, Lablytica Life Science AB, Uppsala, Sweden) using a single lot  
18 of Elypta MIRAM™ Glycosaminoglycan Kit.

19           The method was performed following Elypta MIRAM™ Glycosaminoglycan Kit  
20 instructions for use. All reagents and consumables used were contained in the kit. This method was  
21 based on a previously established protocol for glycosaminoglycan (GAG) extraction and detection  
22 by Volpi et al. (2014) [1]. Briefly, the method consisted of an enzymatic digestion assay using

1 *Chondroitinase ABC* and *Heparinase I-II-III* to depolymerize GAGs in the sample into  
2 disaccharides. Disaccharides were subsequently labeled using 2-aminoacridone. The samples were  
3 then injected into an ultra-high-performance liquid chromatography (UHPLC) coupled with  
4 electrospray ionization triple-quadrupole mass spectrometry system (ESI-MS/MS, Waters®  
5 Acquity I-class Plus Xevo TQ-S micro) for disaccharide separation and detection. The peaks of the  
6 17 disaccharides were acquired at pre-specified retention times through six multiple reaction  
7 monitoring (MRM) transitions using the mass spectrometry software (Waters® TargetLynx). We  
8 used the mass spectrometry software (Waters® TargetLynx) for peak integration, construction of  
9 calibration curves, and quantification. We exported the results processed data in Excel format and  
10 imported it into *R* (4.0.2) for secondary analysis.

## 11 **2.2 Analytical performance tests.**

12 We carried out a battery of tests to characterize the linearity, selectivity, specificity, accuracy,  
13 precision of the calibrators, carryover, stability of the calibrators as well as linearity, selectivity,  
14 specificity, accuracy, precision of the calibrators, stability, recovery, and matrix effects intra- and  
15 inter-laboratory precision in native samples (see SI Methods for detailed experimental  
16 descriptions). The tests were designed using recommendations from the following CLSI Approved  
17 Guidelines: C62-A (LC-MS Methods), EP05-A3 (Precision), EP06-A (Linearity), EP17-A2  
18 (Detection Capability), EP25-A (Stability), C50-A (MS General Principles) C24 (Statistical  
19 Quality Control). We prespecified acceptance criteria for all tests except for matrix effects (see SI  
20 Methods for pre-specified acceptance criteria.

21 The tests were conducted either on blank samples, standard samples, or “proxy urine” and native  
22 urine samples, as appropriate. For standard samples, we created a set of three standard GAG

1 solutions at three different concentrations (low, medium, and high). We prepared the standard GAG  
2 solution at the “high” level by mixing the highest level of the calibrator sample for all disaccharides  
3 in milli-Q water. Next, we serially diluted the sample at the “high” level to “medium” and “low”  
4 levels (1 : 0.50 : 0.25 v/v) using Milli-Q water. For proxy urine samples, we prepared a “proxy  
5 urine” pool by mixing urine collected from healthy donors. Next, we depleted GAGs from the  
6 proxy urine pool by recovering the filtrate resulting from ultracentrifugation (14000 g at 9 °C for  
7 60 minutes) in a 3 kDa filter (provided in the kit). We spiked the standard GAG solution into the  
8 proxy urine at the beginning of sample preparation (before filtration) or immediately after filtration  
9 during sample preparation. For native urine samples, we sourced native urine from self-rated  
10 healthy adult donors and collected them in a polypropylene jar at room temperature. We kept  
11 samples frozen (-80 °C) until the analysis. The study was approved by the Ethical Committee  
12 (Etikprövningsmyndigheten) in Gothenburg, Sweden on February 8, 2018 (#737-17). Further  
13 details on samples are provided in the SI Methods.

## 14 **3 Results**

### 15 **3.1 Overview of the standardized kit method**

16 The kit consisted of a protocol and reagents for sample preparation to extract GAGs from frozen  
17 samples and a method for GAG detection and quantification using LC-MS/MS. Seventeen  
18 disaccharides (8 for CS, 8 for HS, and HA) – here on referred to as analytes – could be  
19 independently and simultaneously measured with the kit. The kit included the standard solution  
20 and instructions to prepare a calibration curve for each analyte starting from the provided highest  
21 calibration level (the nominal concentration of the disaccharide at each calibration level was  
22 provided in Table S1); a mixture of 17 purified disaccharides (one per analyte) to aid the operator

1 in the adjustment of eventual drifts in retention times, and four quality control (QC) samples to be  
2 used in every MS run to monitor inter-sequence variability.

3 In Figure 1, representative chromatograms are illustrated for the afore-mentioned mixture of 17  
4 purified disaccharides quantified using the kit (see Figure S1 for chromatograms derived from the  
5 standard GAG solution).

6

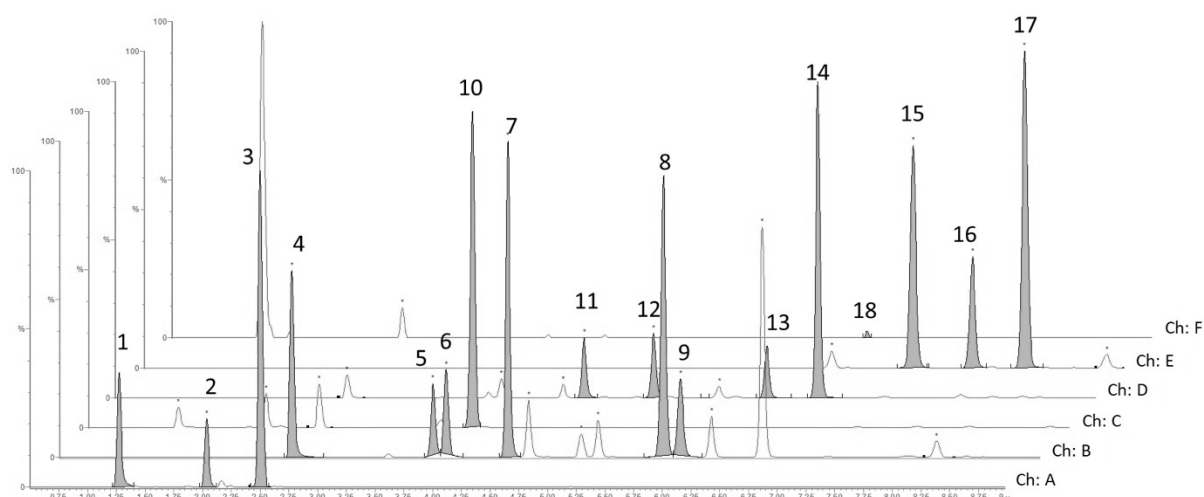

7

8 **Figure 1.** A representative chromatogram for a mixture of 17 purified disaccharides. The 17  
9 disaccharide peaks are acquired in one multiple reaction monitoring (MRM) run across six different  
10 channels (Ch: A to F) based on mass transitions associated with analytes. Key - 1: Tris H; 2: Ns6s  
11 HS, 3: Ns2S HS, 4: Tris CS; 5: 2s4S CS; 6: 2s6s HS, 7: 2s6s CS, 8: 2s HS, 9: 2s CS, 10: Ns HS,  
12 11: 4s6s CS, 12: 6s HS, 13: 4s CS, 14: 6s CS, 15: 0s HS, 16: HA, 17: 0s CS.

13 We characterized the analytical performance of the kit in terms of calibration capability and  
14 performance in native human samples.

### 15 **3.2 Characterization of the kit analytical performance: calibration**

7

1 First, we characterized the calibration curve parameters: linearity, detection capability, selectivity  
2 and specificity, accuracy and precision, carry-over, and disaccharide stability in the auto-sampler.  
3 This process established the performance of the calibration curve over a specific range for each  
4 disaccharide.

5 In the second part, we performed the characterization of the kit in terms of GAGs extraction,  
6 detection, and quantification in native (human) samples by measuring the following parameters:  
7 selectivity and specificity, recovery, matrix effect, linearity response, accuracy and precision, and  
8 disaccharide stability.

### 9 ***3.2.1 Linearity and detection capability of the calibrators***

10 We tested the linearity of the calibration curve for each disaccharide. We prepared nine levels of  
11 calibration of each disaccharide in triplicates, injecting each replicate two times. We pre-specified  
12 acceptance criteria for a level to be included in the final calibration curve in terms of acceptable  
13 coefficient of variation (CV), which was required to be lower than 25% (30% for the lowest level),  
14 and deviation with the respect to the nominal concentration after back-calculation, which was  
15 required to be lower than 25%. We defined the upper limit of quantification (ULoQ) and low limit  
16 of quantification (LLoQ) for each disaccharide as the highest and lowest calibration levels meeting  
17 the acceptance criteria, respectively. We defined the range the linearity as the concentration  
18 between LLoQ and ULoQ.

19 In Table 1, we reported for each disaccharide the number of calibration levels within the range of  
20 linearity between LLoQ and ULoQ, including the coefficient of determination ( $R^2$ ) of the  
21 calibration curve and the coefficient of variation (CV) and deviation of back-calculated  
22 concentration with respect to the nominal concentration at the LLoQ and ULoQ.



1 **Table 1.** Linearity of the calibration curve for each disaccharide including the number of calibrator  
 2 levels, coefficient of determination ( $R^2$ ), and nominal concentration, coefficient of variation (CV),  
 3 and deviation from back-calculated concentration for the lower limit of quantification (LLoQ) and  
 4 upper limit of quantification (ULoQ). Acceptable values are marked in bold. Key: N.C. – not  
 5 calibrated.

| <b>Disaccharide</b> | <b>N levels</b> | <b>R<sup>2</sup></b> | <b>LLoQ</b><br>[ $\mu\text{g mL}^{-1}$ ] | <b>LLoQ</b><br>CV | <b>LLoQ</b><br>deviation | <b>ULoQ</b><br>[ $\mu\text{g mL}^{-1}$ ] | <b>ULoQ</b><br>CV | <b>ULoQ</b><br>deviation |
|---------------------|-----------------|----------------------|------------------------------------------|-------------------|--------------------------|------------------------------------------|-------------------|--------------------------|
| <b>0s CS</b>        | 8               | 1.000                | 0.10                                     | 13%               | -14%                     | 5.33                                     | 2%                | -1%                      |
| <b>4s CS</b>        | 7               | 0.996                | 1.42                                     | 7                 | -19                      | 42.87                                    | 2                 | 2                        |
| <b>6s CS</b>        | 5               | 0.980                | 1.15                                     | 4                 | 1                        | 11.15                                    | 2                 | -10                      |
| <b>4s6s CS</b>      | 4               | 0.999                | 0.06                                     | 12                | -6                       | 0.31                                     | 8                 | -1                       |
| <b>2s4s CS</b>      | 3               | 0.999                | 0.04                                     | 15                | 4                        | 0.11                                     | 11                | 1                        |
| <b>2s6s CS</b>      | 6               | 0.999                | 0.04                                     | 31                | 6                        | 0.60                                     | 5                 | 1                        |
| <b>Tris CS</b>      | 0               | N.C.                 | N.C.                                     | N.C.              | N.C.                     | N.C.                                     | N.C.              | N.C.                     |
| <b>2s CS</b>        | 2               | 1.000                | 0.02                                     | 22                | 0                        | 0.04                                     | 14                | 0                        |
| <b>HA</b>           | 6               | 0.997                | 3.51                                     | 5                 | 23                       | 60.00                                    | 2                 | 3                        |
| <b>Tris HS</b>      | 2               | 1.000                | 0.24                                     | 21                | 0                        | 0.43                                     | 39                | 0                        |
| <b>Ns2s HS</b>      | 3               | 0.999                | 0.46                                     | 26                | 2                        | 1.44                                     | 20                | 0                        |
| <b>2s6s HS</b>      | 0               | N.C.                 | N.C.                                     | N.C.              | N.C.                     | N.C.                                     | N.C.              | N.C.                     |

---

|                |   |       |      |    |     |       |    |    |
|----------------|---|-------|------|----|-----|-------|----|----|
| <b>Ns6s HS</b> | 4 | 0.998 | 0.37 | 22 | 9   | 2.03  | 6  | 1  |
| <b>Ns HS</b>   | 6 | 0.996 | 0.48 | 10 | -16 | 8.20  | 6  | -4 |
| <b>0s HS</b>   | 6 | 0.998 | 2.70 | 6  | -14 | 46.27 | 1  | -3 |
| <b>2s HS</b>   | 3 | 0.995 | 0.02 | 21 | -7  | 0.06  | 14 | -1 |
| <b>6s HS</b>   | 7 | 0.999 | 0.09 | 14 | -29 | 2.66  | 7  | -2 |

---

1 For 15 of 17 disaccharides (all except Tris CS and 2s6s HS), we obtained a calibration curve with  
2 acceptable linearity and detection capability. In cases where the calibration curve could not be  
3 constructed (for Tris CS and 2s6s HS), GAG quantification relied on the ratio between the observed  
4 peak area and the corresponding peak area at the highest level of the provided calibrator.

### 5 **3.2.2 *Selectivity and specificity of the calibrators***

6 We tested the selectivity and specificity to each disaccharide by inspecting the presence of peaks  
7 of an area greater than 20 % LLoQ for that disaccharide in blank samples. For each disaccharide,  
8 no peak could be detected at the expected retention time for that disaccharide in any of the blank  
9 samples. Selectivity and specificity for the kit were therefore deemed acceptable for all  
10 disaccharides.

### 11 **3.2.3 *Accuracy and precision of the calibrators***

12 We tested the accuracy and precision of the calibration curves by creating a set of three standard  
13 GAG solutions at three different concentrations (low, medium, and high). In Table 2 and 3, we  
14 reported the accuracy (percentage difference between nominal concentration for a disaccharide in  
15 the standard GAG solution and measured concentration) over a 2-day experiment and the precision

1 (as CV) for each disaccharide at each standard GAG solution concentration (low, medium, and  
 2 high).

3 **Table 2.** Accuracy (in terms of % deviation from nominal concentration in the standard GAG  
 4 solution) at three concentration levels on two separate days. Acceptable values are marked in bold.

5 Key: N.D. – not detected.

| Disaccharide   | Low   |       | Medium |       | High  |       |
|----------------|-------|-------|--------|-------|-------|-------|
|                | Day 1 | Day 2 | Day 1  | Day 2 | Day 1 | Day 2 |
| <b>0s CS</b>   | -61%  | -59%  | -20%   | -17%  | -9%   | -5%   |
| <b>4s CS</b>   | 14    | 16    | -7     | -5    | -4    | -2    |
| <b>6s CS</b>   | -23   | -20   | 0      | 3     | -1    | 4     |
| <b>4s6s CS</b> | 1     | -3    | 3      | 0     | 2     | 3     |
| <b>2s4s CS</b> | N.D.  | N.D.  | -4     | 1     | -6    | 5     |
| <b>2s6s CS</b> | 1     | -5    | 1      | 1     | 2     | 4     |
| <b>Tris CS</b> | N.D.  | N.D.  | N.D.   | N.D.  | N.D.  | N.D.  |
| <b>2s CS</b>   | N.D.  | N.D.  | N.D.   | N.D.  | 100   | 79    |
| <b>HA</b>      | -27   | -22   | -12    | -9    | -3    | 0     |
| <b>Tris HS</b> | N.D.  | N.D.  | N.D.   | N.D.  | 7     | 6     |
| <b>Ns2s HS</b> | N.D.  | N.D.  | 37     | -25   | 10    | -41   |
| <b>2s6s HS</b> | N.D.  | N.D.  | N.D.   | N.D.  | N.D.  | N.D.  |

|                |      |      |    |      |    |     |
|----------------|------|------|----|------|----|-----|
| <b>Ns6s HS</b> | 26   | 8    | 19 | 4    | 12 | -2  |
| <b>Ns HS</b>   | -18  | -31  | -1 | -14  | 0  | -12 |
| <b>0s HS</b>   | 5    | 1    | 6  | 0    | -3 | -7  |
| <b>2s HS</b>   | N.D. | N.D. | 28 | N.D. | 8  | -49 |
| <b>6s HS</b>   | 4    | -29  | 13 | -21  | 3  | -30 |

1 **Table 3.** Precision (in terms of CV% in the estimated concentration for each disaccharide in the  
 2 standard GAG solution) at three concentration levels over two days. Acceptable values are marked  
 3 in bold. Key: N.D. – not detected.

| <b>Disaccharide</b> | <b>Low</b> |       | <b>Medium</b> |       | <b>High</b> |       |
|---------------------|------------|-------|---------------|-------|-------------|-------|
|                     | Day 1      | Day 2 | Day 1         | Day 2 | Day 1       | Day 2 |
| <b>0s CS</b>        | 2%         | 3%    | 4%            | 4%    | 3%          | 5%    |
| <b>4s CS</b>        | 2          | 3     | 1             | 2     | 3           | 3     |
| <b>6s CS</b>        | 1          | 3     | 1             | 3     | 3           | 5     |
| <b>4s6s CS</b>      | 13         | 12    | 8             | 10    | 7           | 7     |
| <b>2s4s CS</b>      | N.D.       | N.D.  | 15            | 17    | 8           | 14    |
| <b>2s6s CS</b>      | 12         | 13    | 6             | 6     | 8           | 8     |
| <b>Tris CS</b>      | N.D.       | N.D.  | N.D.          | N.D.  | N.D.        | N.D.  |
| <b>2s CS</b>        | N.D.       | N.D.  | N.D.          | N.D.  | 224         | 416   |

---

| <b>HA</b>      | 1    | 4    | 2    | 3    | 3    | 4    |
|----------------|------|------|------|------|------|------|
| <b>Tris HS</b> | N.D. | N.D. | N.D. | N.D. | 20   | 22   |
| <b>Ns2s HS</b> | N.D. | N.D. | 36   | 58   | 22   | 40   |
| <b>2s6s HS</b> | N.D. | N.D. | N.D. | N.D. | N.D. | N.D. |
| <b>Ns6s HS</b> | 16   | 24   | 16   | 20   | 14   | 18   |
| <b>Ns HS</b>   | 5    | 11   | 5    | 12   | 3    | 11   |
| <b>0s HS</b>   | 2    | 5    | 3    | 6    | 3    | 5    |
| <b>2s HS</b>   | N.D. | N.D. | 20   | N.D. | 18   | 41   |
| <b>6s HS</b>   | 8    | 26   | 9    | 29   | 7    | 26   |

---

1 The accuracy was acceptable for virtually all detected CS and HA disaccharides at all 3  
2 concentrations on both Day 1 and Day 2, as well as for most detected HS disaccharides at medium  
3 and high concentrations on Day 1 (but not on Day 2). Similarly, both intraday and inter-day  
4 precision were acceptable for all detected CS and HA disaccharides at all 3 concentrations as well  
5 as for intraday precision for most detected HS disaccharides at all 3 concentrations. We attributed  
6 the results reported in Tables 2 and 3 that did not meet the acceptance criteria to poor signal  
7 acquisition.

#### 8 **3.2.4 Carry-over in the calibrators**

9 We tested the impact of the carry-over by inspecting the presence of peaks of an area greater than  
10 20 % LLoQ for that disaccharide in blank samples immediately after the acquisition of the highest  
11 calibration curve level. For each disaccharide, no peak could be detected at the expected retention

1 time for that disaccharide in any of the blank samples. Carry-over was therefore considered  
2 negligible for all disaccharides.

### 3 **3.2.5 Disaccharide stability in the autosampler**

4 We tested the stability of disaccharides stored in the autosampler at 10 °C by monitoring the peak  
5 area of each analyte over 14 days at the third-highest calibration curve level for that disaccharide.  
6 In Table S2, we reported the change in peak areas for a given disaccharide at a given time point  
7 relative to the corresponding peak area at the initial time point.

8 The stability in the auto-sampler of all disaccharides except Ns2s HS was acceptable over 6 days  
9 (at least 5 of 6-time points with <30% deviation from Day 0). We found that all disaccharides  
10 except 4s CS had poor stability after 14 days in the autosampler.

## 11 **3.3 Characterization of the kit analytical performance: concentration estimation**

12 Having established the performance of the calibration curve for each disaccharide, we could  
13 estimate disaccharide concentrations using the so-characterized calibration curves. In the second  
14 part, we, therefore, performed the characterization of the kit in terms of estimation of the  
15 disaccharide concentration in native samples by measuring the following performance parameters:  
16 selectivity and specificity, recovery, matrix effect, linearity response, accuracy, and precision and  
17 disaccharide stability. For the sake of consistency, we chose human urine as the reference matrix  
18 for the native samples.

### 19 **3.3.1 Recovery**

20 We tested recovery by first generating a GAG-depleted sample (referred to as proxy urine, SI  
21 Methods); and next by spiking the proxy urine with a set of three standard GAG solutions at three  
22 different concentrations (low, medium, and high) either at the beginning of the sample preparation

1 or immediately after filtration during sample preparation. In Table S3, we reported the recovery of  
2 each disaccharide after filtration across five replicates.

3 The results indicated acceptable recovery (<25% deviation) for all detectable CS disaccharides at  
4 all three concentration levels (except 2s CS, acceptable only at the highest level); for all detectable  
5 HS disaccharides at the “low” and “medium” concentration levels (except for 2s HS); and for HA  
6 at the “medium” concentration level.

### 7 **3.3.2 Matrix effect**

8 We tested matrix effects to evaluate how endogenous compounds in native urine interfered with  
9 the measurement of the analytes. We spiked proxy urine from 6 healthy donors and milli-Q water  
10 samples in triplicates with the above-described set of standard GAG solutions at two concentration  
11 levels, “high” and low”. In Table S4, we reported the matrix effect as the ratio (in %) between the  
12 disaccharide concentration in 6 proxy urine samples versus the milli-Q water sample at the two  
13 concentration levels, as well as the average matrix effect in proxy urine.

14 The matrix effect was moderate (between 42% and 89%) in CS disaccharides at the “high” level  
15 and low (78% to 103%) at the “low” level, indicative of signal suppression due to matrix effects.  
16 We found moderate-to-high matrix effects in HA and HS disaccharides at the “high” level and  
17 moderate-to-low at the “low” level.

### 18 **3.3.3 Accuracy and precision in native samples**

19 We tested the accuracy of disaccharide concentrations in native samples by spiking the proxy with  
20 the same set of standard GAG solutions as described above at three different concentration levels  
21 (low, medium, and high). In Table 4, we reported the accuracy in the concentration of each CS  
22 disaccharide in a three-day experiment by two operators on a given analysis day. We computed the

1 intraday precision in terms of coefficient of variation from the same data and reported in Table 5.  
 2 We then computed the intraday precision as the coefficient of variation from the same data and  
 3 reported in Table 5.  
 4 We were unable to reliably determine the accuracy and precision for HA and HS disaccharides  
 5 because their estimated concentrations were close to the respective LLoQ even for the “high” level  
 6 standard GAG solutions. We attributed this partly to matrix effects as later discussed.  
 7 **Table 4.** Accuracy of disaccharide concentration in proxy urine sample spiked at three  
 8 concentration levels of a standard GAG solution over a three-day experiment by two operators.  
 9 Note that accuracy for HA and HS disaccharides could not be reliably estimated in this experiment  
 10 and it was omitted. Acceptable values marked in bold. Key: N.D. – not detected.

| Disaccharide   | Low   |       |       | Medium |       |       | High  |       |       |
|----------------|-------|-------|-------|--------|-------|-------|-------|-------|-------|
|                | Day 1 | Day 2 | Day 3 | Day 1  | Day 2 | Day 3 | Day 1 | Day 2 | Day 3 |
| <b>0s CS</b>   | 21%   | 20%   | 21%   | 31%    | 34%   | 31%   | 32%   | 34%   | 39%   |
| <b>4s CS</b>   | 10    | 0     | 6     | 19     | 15    | 15    | 5     | 5     | 4     |
| <b>6s CS</b>   | 5     | -12   | -9    | 21     | 9     | 11    | 15    | 13    | 20    |
| <b>4s6s CS</b> | 22    | 19    | 19    | 31     | 30    | 27    | 26    | 29    | 30    |
| <b>2s4s CS</b> | N.D.  | N.D.  | N.D.  | N.D.   | N.D.  | N.D.  | 28    | 30    | 31    |
| <b>2s6s CS</b> | 13    | 8     | 11    | 26     | 27    | 26    | 20    | 22    | 27    |
| <b>Tris CS</b> | N.D.  | N.D.  | N.D.  | N.D.   | N.D.  | N.D.  | N.D.  | N.D.  | N.D.  |



**2s CS**                    N.D.    N.D.    N.D.    N.D.    N.D.    N.D.    N.D.    N.D.    N.D.

1 **Table 5.** Precision (in terms of CV%) of disaccharide concentration in proxy urine sample spiked  
 2 at three concentration levels of a standard GAG solution over a three-day experiment by two  
 3 operators. Note that precision for HA and HS disaccharides could not be reliably estimated in this  
 4 experiment and it was omitted. Acceptable values marked in bold. Key: N.D. – not detected.

| Disaccharide   | Low   |       |       | Medium |       |       | High  |       |       |
|----------------|-------|-------|-------|--------|-------|-------|-------|-------|-------|
|                | Day 1 | Day 2 | Day 3 | Day 1  | Day 2 | Day 3 | Day 1 | Day 2 | Day 3 |
| <b>0s CS</b>   | 5%    | 7%    | 6%    | 3%     | 13%   | 12%   | 4%    | 6%    | 17%   |
| <b>4s CS</b>   | 5     | 10    | 12    | 1      | 5     | 5     | 2     | 2     | 3     |
| <b>6s CS</b>   | 6     | 16    | 15    | 2      | 14    | 12    | 4     | 4     | 14    |
| <b>4s6s CS</b> | 13    | 13    | 14    | 8      | 9     | 10    | 7     | 7     | 8     |
| <b>2s4s CS</b> | N.D.  | N.D.  | N.D.  | N.D.   | N.D.  | N.D.  | 13    | 12    | 14    |
| <b>2s6s CS</b> | 11    | 13    | 12    | 8      | 11    | 10    | 7     | 7     | 14    |
| <b>Tris CS</b> | N.D.  | N.D.  | N.D.  | N.D.   | N.D.  | N.D.  | N.D.  | N.D.  | N.D.  |
| <b>2s CS</b>   | N.D.  | N.D.  | N.D.  | N.D.   | N.D.  | N.D.  | N.D.  | N.D.  | N.D.  |

5 The accuracy in native samples was acceptable (<30% deviation from the nominal concentration)  
 6 for all detectable CS disaccharides except for 0s CS, where the accuracy was below 70% in  
 7 “medium” and “high” level samples - albeit never below 60%. The intraday precision in native  
 8 samples was acceptable (CV < 25%) for all detectable CS disaccharides.

### 1 **3.3.4 Disaccharide stability in native samples**

2 We tested the stability of each disaccharide in the native matrix over 14 days. Specifically, we  
3 prepared two proxy urine samples and spiked them with the above-described set of standard GAG  
4 solutions at two concentration levels (“high” and low”). We stored the spiked samples at -20 °C  
5 and measured disaccharide concentrations on day 1 and day 14. In Table S5, we reported the  
6 percentage difference in the disaccharide concentration at a given level (“high” or “low” at Day 1  
7 and Day 14 compared to the corresponding nominal concentration.

8 The stability in native samples was acceptable (<30% deviation from the nominal concentration)  
9 for all detectable CS disaccharides on Day 1 and for 4 of 6 detectable CS disaccharides on Day 14,  
10 where the remaining two CS disaccharides (0s CS and 4s6s CS) deviated from the nominal  
11 concentrations between 33% and 37%, respectively. Note that the stability for HA and HS  
12 disaccharides could not be reliably estimated in this experiment and it was omitted.

### 13 **3.3.5 Selectivity and specificity in native samples**

14 We tested selectivity and specificity to each disaccharide by inspecting the presence of peaks of an  
15 area greater than 20 % LLoQ in proxy urine - without any spiked GAG solution. For each  
16 disaccharide, no peak could be detected in proxy urine at the expected retention time for that  
17 disaccharide. Selectivity and specificity in native samples were therefore acceptable for all  
18 disaccharides.

### 19 **3.3.6 Linearity in native samples**

20 We tested the linearity of disaccharide concentrations in native samples by spiking proxy with the  
21 set of standard GAG solutions as described above at nine different concentration levels. In Table  
22 6, we reported the linearity for each disaccharide in terms of coefficient of determination ( $R^2$ ) for  
23 the linear regression between peak areas and concentration across the nine levels.

1 **Table 6.** Linearity of disaccharides in proxy urine samples (in terms of coefficient of determination  
2  $R^2$  between peak areas and concentration levels) of a standard GAG solution serially diluted to  
3 generate nine concentration levels. Note that stability for HA and HS disaccharides could not be  
4 reliably estimated in this experiment and it was omitted. Acceptable values marked in bold. Key:  
5 N.D. – not detected.

| <b>Disaccharide</b> | <b><math>R^2</math></b> |
|---------------------|-------------------------|
| <b>0s CS</b>        | 0.99                    |
| <b>4s CS</b>        | 1.00                    |
| <b>6s CS</b>        | 0.98                    |
| <b>4s6s CS</b>      | 1.00                    |
| <b>2s4s CS</b>      | 1.00                    |
| <b>2s6s CS</b>      | 0.99                    |
| <b>Tris CS</b>      | N.D.                    |
| <b>2s CS</b>        | 1.00                    |

6 The linearity was acceptable for all detectable CS disaccharides ( $R^2 > 0.95$ ). Note that we were  
7 unable to reliably estimate the linearity for HA and HS disaccharides.

### 8 **3.4 External validation of kit analytical performance**

9 We sought to validate the hereby presented analytical performance specifications by performing  
10 tests of intra-laboratory and interlaboratory precision in a GLP-compliant external laboratory  
11 (Lablytica Life Science AB, Uppsala, Sweden).

### 1 3.4.1 Intra-laboratory precision

2 We tested intra-laboratory precision by monitoring the disaccharide concentration in four QC  
3 samples included in the kit throughout 14 independent experiments (runs). We focused on the two  
4 properties of the GAG profile, non-sulfated CS (0s CS) and total CS, namely the sum of all  
5 measured CS disaccharides in a sample. Two QC samples were synthetic samples spiked with  
6 standard GAG solutions at high or low concentration ( $\sim 14.5 \mu\text{g mL}^{-1}$  and  $\sim 1.7 \mu\text{g mL}^{-1}$  for total  
7 CS, respectively). The other two QC samples were native samples with known high or low total  
8 GAG concentration ( $\sim 12.5 \mu\text{g mL}^{-1}$  and  $\sim 4.2 \mu\text{g mL}^{-1}$  for total CS, respectively). In Figure 2, the  
9 estimated concentration of the two key GAG properties (total CS and 0s CS) were plotted across  
10 runs. The concentrations for all measured CS GAGs were shown in Figure S2. In Table S6, we  
11 reported the CV for each disaccharide in the 4 QC samples.

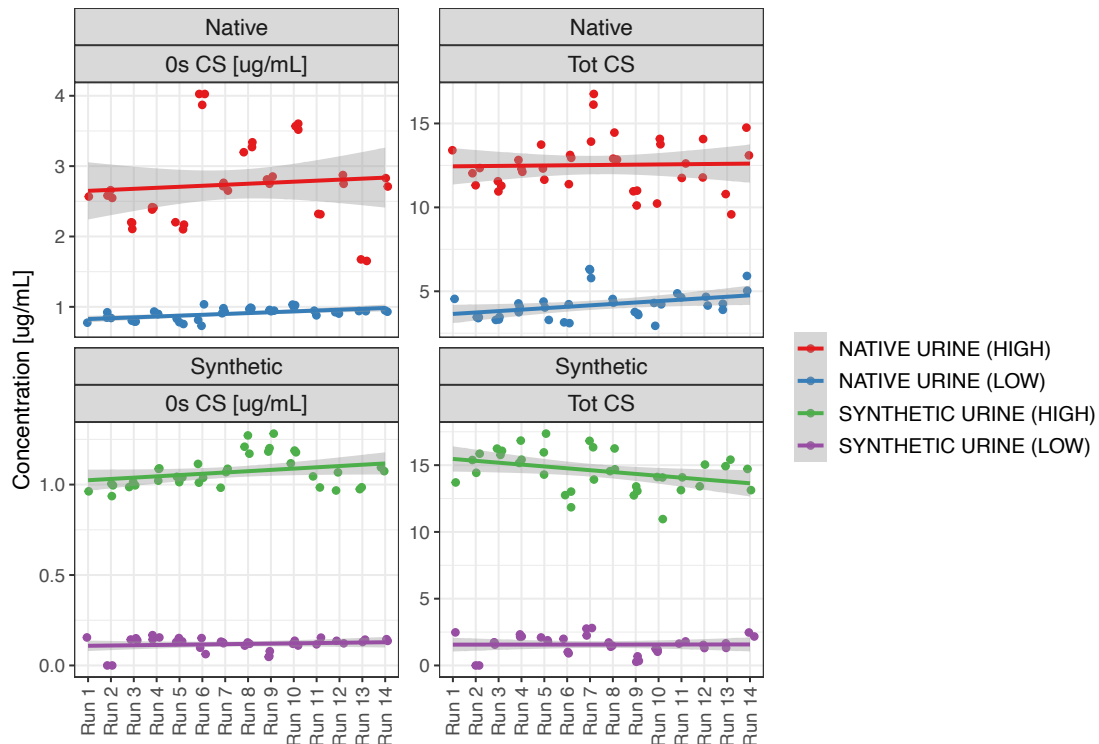

12

1 **Figure 2.** Total CS and 0s CS concentration (in  $\mu\text{g mL}^{-1}$ ) in 4 QC samples (in duplicates) across  
2 14 runs in an external laboratory. The line represents the least square regression for disaccharide  
3 concentration across runs (shaded area represents 95% confidence interval on the regressed mean).  
4 The intra-laboratory precision was acceptable for all major CS disaccharides. The precision for HS  
5 disaccharides was acceptable only in “low” concentration samples, while for HA it was acceptable  
6 only in synthetic QC samples. In general, the concentration for di-sulfated and tri-sulfated  
7 disaccharides as well as 2s disaccharides was below LLoQ in all QC samples and therefore  
8 precision estimates should be interpreted with caution.

### 9 3.4.2 Inter-laboratory precision

10 We tested inter-laboratory precision by comparing the disaccharide concentration of two key GAG  
11 properties (total CS and 0s CS) in a panel of nine native urine samples from healthy donors  
12 independently analyzed in the reference laboratory versus the external laboratory. We found that  
13 the total CS and 0s CS concentration estimates from the reference laboratory versus the external  
14 laboratory, were strongly correlated (Pearson correlation coefficient  $R > 0.95$ ) (Figure 3).

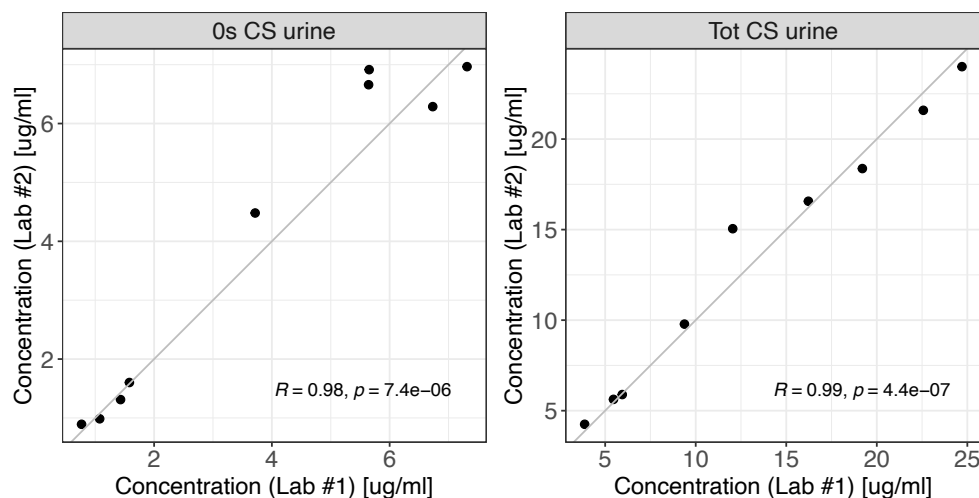

15

1 **Figure 3.** 0s CS and total CS concentration in 9 native urine samples from healthy donors as  
2 estimated in the reference laboratory (Lab #1) versus the external laboratory (Lab #2). The diagonal  
3 line represents the identity line. The Pearson correlation coefficient  $R$  for the correlation is  
4 displayed with its  $p$ -value (permutation test).

#### 5 **4 Discussion**

6 GAGs are increasingly recognized as key molecular actors in mechanisms central to human  
7 physiology and pathology such as structural support within the extracellular matrix and regulation  
8 of cell signaling (2, 24). These mechanisms ultimately control phenotypes that, in disease, can  
9 culminate in physical and mental disabilities in mucopolysaccharidosis (4), jeopardize wound  
10 healing (25), promote cancer (26), lead to respiratory failure (3), or enable binding of viruses such  
11 as SARS-CoV-2 (10). GAGs have therefore been proposed as potential biomarkers for these  
12 different diseases (4, 27, 28). We and others have demonstrated the added advantage of measuring  
13 GAGs non-invasively, for example in blood and urine (5–8, 29). However, moving beyond  
14 biomarker discovery to clinical translation necessitates the standardization of GAG measurements.  
15 LC-MS/MS has emerged in the last decade as the gold standard for rapid quantification of GAG  
16 concentration and disaccharide composition. Many methods were published that illustrated  
17 efficient separation of up to 19 disaccharides in biological samples (11–23). However, none of  
18 these reported extensive analytical performance testing. Therefore, here we comprehensively  
19 characterized the analytical performance of a kit for GAG measurements using an LC-MS/MS  
20 method, which has emerged.

21 Overall, the kit efficiently separated 17 disaccharides and exhibited excellent selectivity and  
22 specificity to all disaccharides with negligible carryover and sufficient stability for typical

1 laboratory work shifts. The calibrators were accurate and precise for 15 of 17 disaccharides over a  
2 range of concentrations covering approximately one-order of magnitude for each disaccharide.  
3 Notably, most above-cited methods appeared to rely on a single point of calibration for all  
4 disaccharides interrogated, thereby returning a relative concentration of each disaccharide in the  
5 sample (i.e. a mass fraction composition). Exceptions to these are the methods presented by  
6 Tomatsu et al. (2014), which reported calibration curves for 7 disaccharides (16), and Yang et al.  
7 (2012), which calibration curves for the same 17 disaccharides as those detected here (23).  
8 Compared to published methods, the here-characterized kit for absolute quantification of GAGs  
9 adequately was found to be capable to calibrate as many as 15 disaccharides simultaneously.

10 In native samples, here using urine as the reference matrix, we demonstrated the robust and accurate  
11 analytical performance characteristics of the kit. Critically for analyses of biological and clinical  
12 samples, the kit enabled the quantification of CS disaccharides within a calibration range that  
13 captured physiological values spanning one order of magnitude. We were unable to validate the  
14 results on HA and HS disaccharides because the concentrations recovered in urine were below the  
15 LLoQ for virtually all of these disaccharides. This could simply reflect a low abundance of urinary  
16 HA and HS in physiological conditions compared to CS. The hypothesis is in line with previous  
17 reports in which the total HA and HS concentration in urine were measured as ~20% of the total  
18 CS concentration, almost an order of magnitude less abundant (8, 18). Nevertheless, we could not  
19 rule out the hypothesis that the kit was underperforming in the quantification of HA and HS  
20 disaccharides in the urine. We attributed one possibility to the here-observed matrix effects, which  
21 showed moderate to strong peak area suppression in HA and HS in the urine. Another explanation  
22 could be a less efficient extraction yield during enzymatic digestion of HA and HS disaccharides

1 as compared to CS disaccharides. Overall, we showed that the kit had an acceptable analytical  
2 performance for the quantification of CS disaccharides in native samples, while its performance in  
3 HA and HS warranted further investigation.

4 We deemed the kit standardized for CS measurements given that the intra-laboratory and inter-  
5 laboratory precision tests produced acceptable results across two independent laboratories.  
6 Specifically, the here-described kit proved capable to simultaneously calibrate 15 of 17  
7 disaccharides with high linearity ( $R^2 > 0.99$  for all disaccharides except 6s CS wherein  $R^2 = 0.98$ )  
8 and with high intra-laboratory precision using 14 replicates of four control urine samples (CV  
9 ranging 8 to 22% at “high” concentration and 8 to 42% at “low” concentration for the major CS  
10 disaccharides, here defined as  $>5\%$  of total CS). In comparison, Tomatsu et al. (2014) reported a  
11 method that could quantify 7 disaccharides (2 keratan sulfate disaccharide, 3 HS, and 2 CS) with  
12 linearity  $R^2$  ranging 0.982 to 0.993 across two orders of magnitude and with an intra-assay precision  
13 CV ranging 2 to 15% using three control serum samples (16). Yang et al. (2012) proposed a method  
14 for the quantification of 17 disaccharides (same as those detected by the kit here described) with  
15 linearity  $R^2$  ranging 0.976 to 0.999 across one order of magnitude -but no estimates on assay  
16 precision (23). Wei et al. (2013) described a method that could quantify 12 HS disaccharides in  
17 relative concentrations (mass fraction %) with an intra-assay precision CV ranging 1 to 21% for  
18 the major HS disaccharides ( $>5\%$  of total HS) using one control serum sample (17). Overall, the  
19 kit had performance characteristics comparable with previously developed methods while  
20 extending the breadth of GAG quantification to 15 disaccharides.

21 In conclusion, we verified the analytical performance of a kit for GAG disaccharide quantification  
22 using an LC/MS-MS method. The findings suggest that the kit had standardized characteristics for



1 the absolute quantification of 15 disaccharides and precise and accurate quantification of CS  
2 disaccharides in native samples. Future work should be directed towards the inclusion of  
3 disaccharides here omitted, for example, keratan sulfate disaccharides, and to improve the  
4 analytical performance in the quantification of HA and HS disaccharides in the urine.

## 5 **5 Acknowledgments**

6 This work was supported by the Knut and Alice Wallenberg Foundation, Cancerfonden, and the  
7 IngaBritt och Arne Lundbergs Forskningsstiftelse (J.N.) and in part by the European Union's  
8 Horizon 2020 research and innovation programme under grant agreement No 849251 (Fr.G.).

## 9 **6 Author contributions**

10 D.T. designed the experimental plan. D.T., S.S., and N.K. performed the experiments. D.T., S.B.,  
11 and Fr.G., analyzed and interpreted the data. F.M., Fa.G., A.B., K.M., N.V. provided critical  
12 feedback in the experimental design, experiment execution, and data interpretation. Fr.G. and J.N.  
13 conceived the study and provided funding. Fr.G. drafted the manuscript. All authors critically  
14 reviewed the manuscript in its final form.

## 15 **7 Conflict of interest**

16 Fr.G. and J.N. are shareholders in Elypta AB. D.T., S.S., K.M, and Fr.G. are employees at Elypta  
17 AB. J.N. is a board member at Elypta AB. A.B. receives advisory fees from Elypta AB. All other  
18 authors declare no conflict of interest.

## 1 **8 References**

- 2 1. J. D. Esko, K. Kimata, U. Lindahl, in *Essentials of Glycobiology*, A. Varki, R. D. Cummings,  
3 J. D. Esko, H. H. Freeze, P. Stanley, C. R. Bertozzi, G. W. Hart, M. E. Etzler, Eds. (Cold  
4 Spring Harbor Laboratory Press, Cold Spring Harbor (NY), ed. 2nd, 2009;  
5 <http://www.ncbi.nlm.nih.gov/books/NBK1900/>).
- 6 2. N. Afratis, C. Gialeli, D. Nikitovic, T. Tsegenidis, E. Karousou, A. D. Theocharis, M. S.  
7 Pavão, G. N. Tzanakakis, N. K. Karamanos, Glycosaminoglycans: key players in cancer cell  
8 biology and treatment. *The FEBS Journal*. **279**, 1177–1197 (2012).
- 9 3. A. B. Souza-Fernandes, P. Pelosi, P. R. Rocco, Bench-to-bedside review: The role of  
10 glycosaminoglycans in respiratory disease. *Crit Care*. **10**, 237 (2006).
- 11 4. R. Lawrence, J. R. Brown, F. Lorey, P. I. Dickson, B. E. Crawford, J. D. Esko, Glycan-based  
12 biomarkers for mucopolysaccharidoses. *Mol Genet Metab*. **111**, 73–83 (2014).
- 13 5. E. P. Schmidt, K. H. Overdier, X. Sun, L. Lin, X. Liu, Y. Yang, L. A. Ammons, T. D. Hiller,  
14 M. A. Sufliata, Y. Yu, Y. Chen, F. Zhang, C. Cothren Burlew, C. L. Edelstein, I. S. Douglas,  
15 R. J. Linhardt, Urinary Glycosaminoglycans Predict Outcomes in Septic Shock and Acute  
16 Respiratory Distress Syndrome. *Am J Respir Crit Care Med*. **194**, 439–449 (2016).
- 17 6. E. P. Schmidt, G. Li, L. Li, L. Fu, Y. Yang, K. H. Overdier, I. S. Douglas, R. J. Linhardt, The  
18 circulating glycosaminoglycan signature of respiratory failure in critically ill adults. *J Biol*  
19 *Chem*. **289**, 8194–8202 (2014).

- 1 7. F. Gatto, K. A. Blum, S. S. Hosseini, M. Ghanaat, M. Kashan, F. Maccari, F. Galeotti, J. J.  
2 Hsieh, N. Volpi, A. A. Hakimi, J. Nielsen, Plasma Glycosaminoglycans as Diagnostic and  
3 Prognostic Biomarkers in Surgically Treated Renal Cell Carcinoma. *European Urology*  
4 *Oncology*. **1**, 364–377 (2018).
- 5 8. F. Gatto, N. Volpi, H. Nilsson, I. Nookaew, M. Maruzzo, A. Roma, M. E. Johansson, U.  
6 Stierner, S. Lundstam, U. Basso, J. Nielsen, Glycosaminoglycan Profiling in Patients' Plasma  
7 and Urine Predicts the Occurrence of Metastatic Clear Cell Renal Cell Carcinoma. *Cell Rep.*  
8 **15**, 1822–1836 (2016).
- 9 9. T. M. Clausen, G. Kumar, E. K. Ibsen, M. S. Ørum-Madsen, A. Hurtado-Coll, T. Gustavsson,  
10 M. Ø. Agerbæk, F. Gatto, T. Todenhöfer, U. Basso, M. A. Knowles, M. Sanchez-Carbayo,  
11 A. Salanti, P. C. Black, M. Daugaard, A simple method for detecting oncofetal chondroitin  
12 sulfate glycosaminoglycans in bladder cancer urine. *Cell Death Discovery*. **6**, 1–7 (2020).
- 13 10. T. M. Clausen, D. R. Sandoval, C. B. Spliid, J. Pihl, H. R. Perrett, C. D. Painter, A. Narayanan,  
14 S. A. Majowicz, E. M. Kwong, R. N. McVicar, B. E. Thacker, C. A. Glass, Z. Yang, J. L.  
15 Torres, G. J. Golden, P. L. Bartels, R. N. Porell, A. F. Garretson, L. Laubach, J. Feldman, X.  
16 Yin, Y. Pu, B. M. Hauser, T. M. Caradonna, B. P. Kellman, C. Martino, P. L. S. M. Gordts,  
17 S. K. Chanda, A. G. Schmidt, K. Godula, S. L. Leibel, J. Jose, K. D. Corbett, A. B. Ward, A.  
18 F. Carlin, J. D. Esko, SARS-CoV-2 Infection Depends on Cellular Heparan Sulfate and  
19 ACE2. *Cell* (2020), doi:10.1016/j.cell.2020.09.033.

- 1 11. N. Volpi, R. J. Linhardt, High-performance liquid chromatography-mass spectrometry for  
2 mapping and sequencing glycosaminoglycan-derived oligosaccharides. *Nature Protocols*. **5**,  
3 993–1004 (2010).
- 4 12. N. Volpi, F. Galeotti, B. Yang, R. J. Linhardt, Analysis of glycosaminoglycan-derived,  
5 precolumn, 2-aminoacridone–labeled disaccharides with LC-fluorescence and LC-MS  
6 detection. *Nature Protocols*. **9**, 541–558 (2014).
- 7 13. W. Wei, M. R. Niñonuevo, A. Sharma, L. M. Danan-Leon, J. A. Leary, A Comprehensive  
8 Compositional Analysis of Heparin/Heparan Sulfate-Derived Disaccharides from Human  
9 Serum. *Anal. Chem.* **83**, 3703–3708 (2011).
- 10 14. H. Liu, Q. Liang, J. S. Sharp, Peracylation Coupled with Tandem Mass Spectrometry for  
11 Structural Sequencing of Sulfated Glycosaminoglycan Mixtures without Depolymerization.  
12 *J. Am. Soc. Mass Spectrom.* **31**, 2061–2072 (2020).
- 13 15. X. Han, P. Sanderson, S. Nesheiwat, L. Lin, Y. Yu, F. Zhang, I. J. Amster, R. J. Linhardt,  
14 Structural analysis of urinary glycosaminoglycans from healthy human subjects.  
15 *Glycobiology*. **30**, 143–151 (2020).
- 16 16. S. Tomatsu, T. Shimada, R. W. Mason, J. Kelly, W. A. LaMarr, E. Yasuda, Y. Shibata, H.  
17 Futatsumori, A. M. Montañó, S. Yamaguchi, Y. Suzuki, T. Orii, Assay for  
18 Glycosaminoglycans by Tandem Mass Spectrometry and its Applications. *J Anal Bioanal*  
19 *Tech.* **2014**, 006 (2014).

- 1 17. W. Wei, R. L. Miller, J. A. Leary, Method development and analysis of free HS and HS in  
2 proteoglycans from pre- and postmenopausal women: evidence for biosynthetic pathway  
3 changes in sulfotransferase and sulfatase enzymes. *Anal Chem.* **85**, 5917–5923 (2013).
- 4 18. X. Sun, L. Li, K. H. Overdier, L. A. Ammons, I. S. Douglas, C. C. Burlew, F. Zhang, E. P.  
5 Schmidt, L. Chi, R. J. Linhardt, Analysis of Total Human Urinary Glycosaminoglycan  
6 Disaccharides by Liquid Chromatography–Tandem Mass Spectrometry. *Anal Chem.* **87**,  
7 6220–6227 (2015).
- 8 19. Y.-H. Chen, Y. Narimatsu, T. M. Clausen, C. Gomes, R. Karlsson, C. Steentoft, C. B. Spliid,  
9 T. Gustavsson, A. Salanti, A. Persson, A. Malmström, D. Willén, U. Ellervik, E. P. Bennett,  
10 Y. Mao, H. Clausen, Z. Yang, The GAGOme: a cell-based library of displayed  
11 glycosaminoglycans. *Nature Methods.* **15**, 881–888 (2018).
- 12 20. F. Maccari, F. Galeotti, V. Mantovani, L. Zampini, L. Padella, L. Rigon, D. Concolino, A.  
13 Fiumara, E. Pascale, A. Pittalà, T. Galeazzi, C. Monachesi, R. L. Marchesiello, G. Coppa, O.  
14 Gabrielli, N. Volpi, Composition and structure of glycosaminoglycans in DBS from 2-3-day-  
15 old newborns for the diagnosis of mucopolysaccharidosis. *Anal Biochem.* **557**, 34–41 (2018).
- 16 21. F. Maccari, F. Galeotti, L. Zampini, L. Padella, R. Tomanin, D. Concolino, A. Fiumara, T.  
17 Galeazzi, G. Coppa, O. Gabrielli, N. Volpi, Total and single species of uronic acid-bearing  
18 glycosaminoglycans in urine of newborns of 2-3days of age for early diagnosis application.  
19 *Clin Chim Acta.* **463**, 67–72 (2016).

- 1 22. J. C. Silva, M. S. Carvalho, X. Han, K. Xia, P. E. Mikael, J. M. S. Cabral, F. C. Ferreira, R.  
2 J. Linhardt, Compositional and structural analysis of glycosaminoglycans in cell-derived  
3 extracellular matrices. *Glycoconj J.* **36**, 141–154 (2019).
- 4 23. B. Yang, Y. Chang, A. M. Weyers, E. Sterner, R. J. Linhardt, Disaccharide analysis of  
5 glycosaminoglycan mixtures by ultra-high-performance liquid chromatography-mass  
6 spectrometry. *J Chromatogr A.* **1225**, 91–98 (2012).
- 7 24. N. K. Karamanos, Extracellular matrix: key structural and functional meshwork in health and  
8 disease. *The FEBS Journal.* **286**, 2826–2829 (2019).
- 9 25. E. Huet, C. Jaroz, H. Q. Nguyen, Y. Belkacemi, A. de la Taille, V. Stavriniades, H. Whitaker,  
10 Stroma in normal and cancer wound healing. *The FEBS Journal.* **286**, 2909–2920 (2019).
- 11 26. J. Wei, M. Hu, K. Huang, S. Lin, H. Du, Roles of Proteoglycans and Glycosaminoglycans in  
12 Cancer Development and Progression. *International Journal of Molecular Sciences.* **21**, 5983  
13 (2020).
- 14 27. M. Hu, Y. Lan, A. Lu, X. Ma, L. Zhang, in *Progress in Molecular Biology and Translational*  
15 *Science* (Elsevier, 2019; <https://linkinghub.elsevier.com/retrieve/pii/S1877117318301509>),  
16 vol. 162, pp. 1–24.
- 17 28. L. Xu, L. Tang, L. Zhang, Proteoglycans as miscommunication biomarkers for cancer  
18 diagnosis. *Prog Mol Biol Transl Sci.* **162**, 59–92 (2019).

- 1 29. F. Gatto, M. Maruzzo, C. Magro, U. Basso, J. Nielsen, Prognostic Value of Plasma and Urine  
2 Glycosaminoglycan Scores in Clear Cell Renal Cell Carcinoma. *Front. Oncol.* **6** (2016),  
3 doi:10.3389/fonc.2016.00253.

4

5
